# Supplementary material for: Colonic Microbiota Profile Characterization of the Responsiveness to Dietary Fibre Treatment in Hypercholesterolemia
Source: MDPI journal article supplement (doi:10.3390/nu14030525), 2022-01-25

## **Colonic microbiota profile characterization of the responsiveness to dietary fibre treatment in hypercholesterolemia.**

**Ana Belen Granado-Serrano<sup>1</sup>, Meritxell Martín-Garí<sup>1</sup>, Virginia Sánchez<sup>2</sup>, Marissa Riart Solans<sup>2</sup>, Antonia Lafarga Giribets, Rebeca Berdún<sup>1</sup>, Ester Vilaprinyó<sup>3</sup>, Manuel Portero-Otín M<sup>1</sup> and José CE Serrano<sup>1\*</sup>**

<sup>1</sup> NUTREN-Nutrigenomics, Department of Experimental Medicine, University of Lleida, Lleida, Spain

<sup>2</sup> Institut Català de la Salut, Catalunya, Spain

<sup>3</sup> Department of Basic Medical Sciences, University of Lleida, Lleida, Spain

\* Correspondence: josecarlos.serrano@udl.cat; Tel.: +34-973702408

**Table S1. Nutritional composition of dietary fibre-rich cookies.** Wheat-bran, Psyllium plantago and Onion-based antioxidant dietary fibre presented the same nutritional composition. Values are presented per 100 g of product. The final weight of each cookie was 15.5 g

| Nutrient            | Content per 100 g      |
|---------------------|------------------------|
| Energy              | 329.5 kcal (1386,5 kJ) |
| Protein             | 6.2 g                  |
| Carbohydrates       | 51.2 g                 |
| Sugars              | 27.5 g                 |
| Starch              | 23.7 g                 |
| Fat                 | 11.1 g                 |
| Saturated fat       | 3.9 g                  |
| Monounsaturated fat | 5.0 g                  |
| Polyunsaturated fat | 2.2 g                  |
| Dietary fibre       | 21.0 g                 |

**Table S2. Demographic characteristics of volunteers included in the study.** Data is presented as mean  $\pm$  standard deviation, range (min – max) and 95% confidence interval of the mean (min–max). A total of 63 volunteers were included in the study (26 female and 37 male).

| Parameter                            | Mean $\pm$ standard deviation | Range (min – max) | 95% CI of the mean (min – max) |
|--------------------------------------|-------------------------------|-------------------|--------------------------------|
| Age (years)                          | 53.9 $\pm$ 7.0                | 37 - 68           | 52.1 – 55.7                    |
| <b>Anthropometric parameters</b>     |                               |                   |                                |
| Body mass index (kg/m <sup>2</sup> ) | 27.1 $\pm$ 3.3                | 19.2 – 34.6       | 26.2 – 27.9                    |
| Waist circumference                  |                               |                   |                                |
| Female (cm)                          | 89.1 $\pm$ 7.4                | 72.0 – 109.6      | 86.6 – 91.5                    |
| Male (cm)                            | 100.6 $\pm$ 7.0               | 84.5 – 111.0      | 97.7 – 103.4                   |
| Waist/Hip ratio                      |                               |                   |                                |
| Female (cm)                          | 0.87 $\pm$ 0.07               | 0.72 – 1.02       | 0.85 – 0.89                    |
| Male (cm)                            | 0.96 $\pm$ 0.04               | 0.86 – 1.04       | 0.94 – 0.97                    |
| Skinfolds thickness                  |                               |                   |                                |
| Biceps (mm)                          | 11.4 $\pm$ 4.9                | 4.0 – 25.5        | 10.1 – 12.6                    |
| Triceps (mm)                         | 20.5 $\pm$ 7.1                | 6.1 – 37.0        | 18.7 – 22.3                    |
| Subscapular (mm)                     | 21.9 $\pm$ 6.5                | 11.5 – 36.0       | 20.3 – 23.6                    |
| Suprailiac (mm)                      | 16.1 $\pm$ 5.6                | 6.5 – 28.5        | 14.7 – 17.5                    |
| Body fat percentage (%)              |                               |                   |                                |
| Female (%)                           | 32.5 $\pm$ 4.7                | 24.7 – 42.5       | 30.9 – 34.1                    |
| Male (%)                             | 25.2 $\pm$ 4.9                | 16.4 – 33.3       | 23.2 – 27.2                    |
| <b>Blood pressure</b>                |                               |                   |                                |
| Systolic (mmHg)                      | 129 $\pm$ 18                  | 92 - 177          | 125 – 134                      |
| Diastolic (mmHg)                     | 86 $\pm$ 10                   | 69 - 112          | 83 - 88                        |
| <b>Nutritional parameters</b>        |                               |                   |                                |
| Energy intake (kcal/day)             | 1750 $\pm$ 412                | 860 - 3084        | 1646 – 1853                    |
| Protein intake (g/day)               | 79.6 $\pm$ 31.5               | 25.1 – 208.0      | 71.6 – 87.5                    |
| Carbohydrate intake (g/day)          | 120.0 $\pm$ 61.3              | 6.8 – 307.0       | 104.6 – 135.4                  |
| Fat intake (g/day)                   | 76.0 $\pm$ 28.2               | 23.4 – 182.0      | 68.9 – 83.1                    |
| Saturated fat (g/day)                | 23.0 $\pm$ 10.8               | 4.4 – 58.7        | 20.3 – 25.7                    |
| Monounsaturated fat (g/day)          | 31.8 $\pm$ 11.7               | 7.5 – 60.3        | 28.8 – 34.8                    |
| Polyunsaturated fat (g/day)          | 10.9 $\pm$ 4.8                | 3.0 – 27.0        | 9.7 – 12.2                     |
| Energy intake distribution           |                               |                   |                                |
| Protein (%)                          | 17.8 $\pm$ 4.6                | 8.9 – 28.7        | 16.7 – 18.9                    |
| Carbohydrates (%)                    | 41.6 $\pm$ 9.4                | 23.1 – 70.6       | 39.3 – 44.0                    |
| Fat (%)                              | 38.6 $\pm$ 8.4                | 16.2 – 55.9       | 36.5 – 40.7                    |
| Fibre intake (g/day)                 | 19.5 $\pm$ 7.0                | 6.7 – 44.6        | 17.7 – 21.2                    |
| <b>Blood lipid profile</b>           |                               |                   |                                |
| Total cholesterol (mg/dL)            | 208.5 $\pm$ 26.2              | 158 - 282         | 201.9 – 215.2                  |
| VLDL-Cholesterol (mg/dL)             | 12.7 $\pm$ 8.9                | 1.9 – 44.8        | 10.4 – 14.9                    |
| IDL-Cholesterol (mg/dL)              | 10.8 $\pm$ 3.7                | 5.5 – 21.4        | 9.9 – 11.8                     |
| LDL-Cholesterol (mg/dL)              | 127.0 $\pm$ 20.2              | 90.9 – 191.6      | 121.9 – 132.1                  |
| HDL-Cholesterol (mg/dL)              | 58.0 $\pm$ 1.4                | 41.2 – 91.5       | 55.2 – 60.7                    |
| Total triacylglycerides (mg/dL)      | 109.9 $\pm$ 48.6              | 52.6 – 315.9      | 97.6 – 122.3                   |
| VLDL-triacylglycerides (mg/dL)       | 67.8 $\pm$ 43.7               | 18.5 – 271.6      | 56.7 – 78.9                    |
| IDL-triacylglycerides (mg/dL)        | 11.6 $\pm$ 3.0                | 6.3 – 18.2        | 10.8 – 12.3                    |
| LDL-triacylglycerides (mg/dL)        | 15.9 $\pm$ 4.3                | 7.8 – 28.2        | 14.8 – 17.1                    |
| HDL-triacylglycerides (mg/dL)        | 14.6 $\pm$ 4.5                | 8.0 – 30.6        | 13.5 – 15.8                    |
| Particle size                        |                               |                   |                                |
| VLDL-z                               | 42.74 $\pm$ 0.51              | 41.44 – 43.88     | 42.61 – 42.87                  |
| LDL-z                                | 21.09 $\pm$ 0.17              | 20.38 – 21.48     | 21.04 – 21.13                  |
| HDL-z                                | 8.20 $\pm$ 0.50               | 8.02 – 8.26       | 8.18 – 8.21                    |
| Particle number                      |                               |                   |                                |
| Large VLDL (nmol/L)                  | 1.49 $\pm$ 0.74               | 0.40 – 3.83       | 1.31 – 1.68                    |
| Medium VLDL (nmol/L)                 | 6.94 $\pm$ 3.85               | 1.66 – 23.81      | 5.96 – 7.91                    |

|                                       |               |               |               |
|---------------------------------------|---------------|---------------|---------------|
| Small VLDL (nmol/L)                   | 37.7 ± 26.0   | 10.1 – 156.3  | 29.1 – 42.3   |
| Large LDL (nmol/L)                    | 115.2 ± 22.6  | 66.3 – 187.8  | 109.5 – 121.0 |
| Medium LDL (nmol/L)                   | 341.1 ± 63.0  | 200.0 – 519.8 | 325.1 – 357.1 |
| Small LDL (nmol/L)                    | 449.5 ± 77.9  | 301.2 – 659.9 | 429.7 – 469.3 |
| Large HDL (μmol/L)                    | 0.20 ± 0.09   | 0.40 – 0.70   | 0.17 – 0.22   |
| Medium HDL (μmol/L)                   | 8.92 ± 2.57   | 3.16 – 14.7   | 8.27 – 9.57   |
| Small HDL (μmol/L)                    | 20.03 ± 3.54  | 13.93 – 31.30 | 21.13 – 22.93 |
| Other parameters                      |               |               |               |
| NonHDL-p (nmol/L)                     | 918.8 ± 150.9 | 642 – 1365    | 880 – 957     |
| Total-p / HDL-p                       | 31.1 ± 6.3    | 19.4 – 45.3   | 29.5 – 32.7   |
| LDL-p/HDL-P                           | 29.7 ± 6.1    | 18.3 – 44.4   | 28.1 – 31.2   |
| <b>Faeces Short-chain Fatty acids</b> |               |               |               |
| Total (mmol/g faeces)                 | 52.2 ± 39.7   | 5.3 – 165.2   | 41.0 – 63.3   |
| Acetic acid (mmol/g faeces)           | 32.4 ± 27.4   | 3.2 – 121.1   | 24.7 – 40.1   |
| Propionic acid (mmol/g faeces)        | 10.0 ± 7.7    | 1.2 – 36.7    | 7.8 – 12.2    |
| Butyric acid (mmol/g faeces)          | 9.1 ± 7.7     | 0.4 – 38.0    | 6.9 – 11.3    |
| Distribution                          |               |               |               |
| % Acetic acid                         | 60.8 ± 7.9    | 45.9 – 78.0   | 58.6 – 63.0   |
| % Propionic acid                      | 19.8 ± 5.2    | 8.5 – 36.1    | 18.4 – 21.3   |
| % Butyric acid                        | 16.8 ± 6.2    | 4.9 – 34.8    | 15.1 – 18.6   |

---

**Table S3. Changes in blood lipid profile (mg/dL) after two months of treatment of wheat bran, psyllium plantago and onion-based antioxidant fibre.** Data is presented as mean differences (2 months – basal conditions) of each parameter and 95% CI of the mean differences in parenthesis (min to max). The significance of difference observed in each treatment was determined by paired t-test analysis; p-values are included at the right hand of each column. Differences between fibre treatments were determined by one-way anova analysis. Tuckey's multiple comparison tests were performed to determine differences between fibre treatments. P-values below 0.05 were considered as significant differences between the compared variables.

| <i>Parameter</i>                | <b>Wheat bran fibre</b>  |                | <b>Psyllium plantago fibre</b> |                | <b>Onion-based fibre</b> |                | <i>Treatment difference</i><br><i>p-value</i> |
|---------------------------------|--------------------------|----------------|--------------------------------|----------------|--------------------------|----------------|-----------------------------------------------|
|                                 | <i>Difference</i>        | <i>p-value</i> | <i>Difference</i>              | <i>p-value</i> | <i>Difference</i>        | <i>p-value</i> |                                               |
| Total cholesterol (mg/dL)       | 4.83 (-6.04 to 15.71)    | 0.3637         | 8.90 (-1.74 to 19.54)          | 0.0964         | -0.86 (-9.03 to 7.30)    | 0.8272         | 0.3465                                        |
| VLDL                            | 2.20 (-3.30 to 7.71)     | 0.4118         | -1.04 (-6.14 to 4.06)          | 0.6746         | -1.03 (4.37 to 2.32)     | 0.5284         | 0.5130                                        |
| IDL                             | 1.80 (-0.48 to 4.08)     | 0.1157         | <b>1.53 (0.51 to 2.57)</b>     | <b>0.0054</b>  | 0.08 (-1.46 to 1.63)     | 0.4505         | 0.0794                                        |
| LDL                             | 2.56 (-4.93 to 10.07)    | 0.4825         | 8.40 (-1.35 to 18.15)          | 0.0875         | 1.01 (-4.08 to 6.12)     | 0.6826         | 0.3300                                        |
| HDL                             | -1.74 (-4.72 to 1.24)    | 0.2371         | 0.003 (-3.35 to 3.36)          | 0.9984         | -0.32 (-2.89 to 2.26)    | 0.7995         | 0.6643                                        |
| Total triacylglycerides (mg/dL) | 13.81 (-14.88 to 42.49)  | 0.3263         | -6.09 (-35.09 to 22.90)        | 0.6658         | -3.98 (-20.28 to 12.32)  | 0.6161         | 0.4522                                        |
| VLDL                            | 10.14 (-13.05 to 33.32)  | 0.3717         | -9.21 (-36.71 to 18.28)        | 0.4926         | -1.05 (-13.90 to 11.80)  | 0.8664         | 0.4370                                        |
| IDL                             | 1.06 (-0.89 to 3.01)     | 0.2695         | <b>1.17 (0.16 to 2.18)</b>     | <b>0.0247</b>  | -0.68 (-1.99 to 0.62)    | 0.2839         | 0.1525                                        |
| LDL                             | 1.14 (-1.16 to 3.42)     | 0.3125         | <b>2.23 (0.49 to 3.96)</b>     | <b>0.0145</b>  | -0.93 (-2.47 to 0.60)    | 0.2176         | <b>0.0446</b>                                 |
| HDL                             | 1.48 (-1.39 to 4.35)     | 0.2944         | -0.28 (-2.44 to 1.88)          | 0.7897         | -1.30 (-2.97 to 0.37)    | 0.1197         | 0.1986                                        |
| Particle size (nm)              |                          |                |                                |                |                          |                |                                               |
| VLDL-z                          | -0.12 (-0.32 to 0.07)    | 0.2052         | 0.057 (-0.22 to 0.34)          | 0.6798         | -0.179 (-0.389 to 0.039) | 0.1022         | 0.3142                                        |
| LDL-z                           | -0.061 (-0.139 to 0.016) | 0.1159         | 0.018 (-0.08 to 0.11)          | 0.6946         | -0.040 (0.091 to 0.011)  | 0.1174         | 0.2916                                        |
| HDL-z                           | -0.004 (-0.021 to 0.012) | 0.5937         | -0.003 (-0.027 to 0.020)       | 0.7470         | 0.007 (-0.009 to 0.024)  | 0.3745         | 0.6209                                        |

**Table S4. Observed changes after 2 months of dietary fibre supplementation in all volunteers.** Data are presented as mean and 95% confidence interval of the mean (min – max) (n=63 volunteers). Paired t-test was used to determine statistical differences of parameters at baseline and 2 months of treatment. P-values below 0.05 were considered as a significant difference and highlighted in bold.

| Parameter                            | Baseline                   | 2 months                   | p-value           |
|--------------------------------------|----------------------------|----------------------------|-------------------|
| <b>Anthropometric parameters</b>     |                            |                            |                   |
| Body mass index (kg/m <sup>2</sup> ) | 27.1 (26.2-27.9)           | 27.0 (26.2-27.9)           | 0.4898            |
| Waist circumference                  | <b>93.8 (91.5-96.1)</b>    | <b>95.8 (93.8-98.0)</b>    | <b>&lt;0.0001</b> |
| Waist/Hip ratio                      | <b>0.91 (0.89-0.93)</b>    | <b>0.93 (0.91-0.94)</b>    | <b>&lt;0.0001</b> |
| Skinfolds thickness                  |                            |                            |                   |
| Biceps (mm)                          | <b>11.4 (10.1-12.6)</b>    | <b>12.4 (11.0-13.8)</b>    | <b>0.0028</b>     |
| Triceps (mm)                         | 20.5 (18.7-22.3)           | 21.1 (19.2-22.9)           | 0.2585            |
| Subscapular (mm)                     | 21.9 (20.3-23.6)           | 21.3 (19.7-22.9)           | 0.0821            |
| Suprailiac (mm)                      | <b>16.1 (14.7-17.5)</b>    | <b>17.3 (15.9-18.7)</b>    | <b>0.0382</b>     |
| Body fat percentage (%)              | <b>29.5 (28.0-31.0)</b>    | <b>30.9 (29.4-32.4)</b>    | <b>0.0034</b>     |
| <b>Blood pressure</b>                |                            |                            |                   |
| Systolic (mmHg)                      | 129 (125-134)              | 126 (122-130)              | 0.0508            |
| Diastolic (mmHg)                     | <b>86 (83-88)</b>          | <b>84 (81-86)</b>          | <b>0.0106</b>     |
| <b>Nutritional parameters</b>        |                            |                            |                   |
| Energy intake (kcal/day)             | 1750 (1646-1853)           | 1737 (1608-1866)           | 0.8496            |
| Protein intake (g/day)               | 79.6 (71.6-87.5)           | 78.9 (72.3-85.5)           | 0.8709            |
| Carbohydrate intake (g/day)          | 120.0 (104.6-135.4)        | 116.9 (98.9-134.9)         | 0.5958            |
| Fat intake (g/day)                   | 76.0 (68.9-83.1)           | 70.3 (63.5-77.1)           | 0.1821            |
| Saturated fat (g/day)                | 23.0 (20.3-25.7)           | 22.4 (19.8-25.1)           | 0.7189            |
| Monounsaturated fat (g/day)          | 31.8 (28.8-34.8)           | 30.4 (27.4-33.2)           | 0.4502            |
| Polyunsaturated fat (g/day)          | 10.9 (9.7-12.2)            | 9.8 (8.8-10.9)             | 0.1360            |
| Fibre intake (g/day)                 | 19.5 (17.7-21.2)           | 18.7 (16.8-20.6)           | 0.4778            |
| Energy intake distribution           |                            |                            |                   |
| Protein (%)                          | 17.8 (16.7-18.9)           | 19.0 (17.6-20.4)           | 0.0828            |
| Carbohydrates (%)                    | 41.6 (39.3-44.0)           | 41.9 (39.3-44.5)           | 0.8741            |
| Fat (%)                              | 38.6 (36.5-40.7)           | 36.7 (34.5-39.0)           | 0.1722            |
| <b>Blood lipid profile</b>           |                            |                            |                   |
| Total cholesterol (mg/dL)            | 208.5 (201.9-215.2)        | 212.8 (206.4-219.2)        | 0.1249            |
| VLDL-Cholesterol (mg/dL)             | 12.7 (10.4-14.9)           | 12.7 (10.4-15.0)           | 0.9941            |
| IDL-Cholesterol (mg/dL)              | 10.8 (9.9-11.8)            | 11.7 (10.7-12.8)           | 0.0532            |
| LDL-Cholesterol (mg/dL)              | 127.0 (121.9-132.1)        | 131.0 (126.2-135.8)        | 0.0645            |
| HDL-Cholesterol (mg/dL)              | 58.0 (55.2-60.7)           | 57.3 (54.7-60.0)           | 0.4184            |
| Total triacylglycerides (mg/dL)      | 109.9 (97.6-122.3)         | 111.0 (99.8-122.2)         | 0.9264            |
| VLDL-triacylglycerides (mg/dL)       | 67.8 (56.7-78.9)           | 67.6 (58.2-76.9)           | 0.9728            |
| IDL-triacylglycerides (mg/dL)        | 11.6 (10.8-12.3)           | 12.1 (11.2-12.9)           | 0.2233            |
| LDL-triacylglycerides (mg/dL)        | 15.9 (14.8-17.1)           | 16.7 (15.6-17.9)           | 0.1389            |
| HDL-triacylglycerides (mg/dL)        | 14.6 (13.5-15.8)           | 14.6 (13.4-15.7)           | 0.9264            |
| Particle size (nm)                   |                            |                            |                   |
| VLDL-z                               | 42.74 (42.61-42.87)        | 42.66 (42.53-42.78)        | 0.2210            |
| LDL-z                                | 21.09 (21.04-21.13)        | 21.06 (21.01-21.10)        | 0.2207            |
| HDL-z                                | 8.20 (8.18-8.21)           | 8.20 (8.18-8.21)           | 0.9710            |
| Particle number                      |                            |                            |                   |
| Large VLDL (nmol/L)                  | 1.49 (1.31-1.68)           | 1.49 (1.32-1.68)           | 0.9928            |
| Medium VLDL (nmol/L)                 | 6.94 (5.96-7.91)           | 6.80 (5.91-7.69)           | 0.8121            |
| Small VLDL (nmol/L)                  | 37.7 (29.1-42.3)           | 35.9 (30.3-41.5)           | 0.9565            |
| Large LDL (nmol/L)                   | 115.2 (109.5-121.0)        | 116.2 (110.7-121.7)        | 0.7412            |
| Medium LDL (nmol/L)                  | 341.1 (325.1-357.1)        | 353.4 (338.7-368.1)        | 0.0835            |
| Small LDL (nmol/L)                   | <b>449.5 (429.7-469.3)</b> | <b>471.5 (451.1-491.9)</b> | <b>0.0081</b>     |
| Large HDL (μmol/L)                   | 0.20 (0.17-0.22)           | 0.20 (0.18-0.22)           | 0.8524            |
| Medium HDL (μmol/L)                  | 8.92 (8.27-9.57)           | 8.81 (8.17-9.45)           | 0.5707            |
| Small HDL (μmol/L)                   | 20.03 (21.13-22.93)        | 21.8 (21.0-22.7)           | 0.6231            |
| Other parameters                     |                            |                            |                   |

|                                       |                  |                     |        |
|---------------------------------------|------------------|---------------------|--------|
| NonHDL-p (nmol/L)                     | 918.8 (880-957)  | 954.4 (916.8-992.1) | 0.0233 |
| Total-p / HDL-p                       | 31.1 (29.5-32.7) | 32.56 (30.88-34.24) | 0.0146 |
| LDL-p/HDL-P                           | 29.7 (28.1-31.2) | 31.10 (29.29-32.72) | 0.0273 |
| <b>Faeces Short-chain Fatty acids</b> |                  |                     |        |
| Total (mmol/g faeces)                 | 52.2 (41.0-63.3) | 50.3 (40.5-60.1)    | 0.5947 |
| Acetic acid (mmol/g faeces)           | 32.4 (24.7-40.1) | 30.5 (24.2-36.5)    | 0.5848 |
| Propionic acid (mmol/g faeces)        | 10.0 (7.8-12.2)  | 10.2 (8.2-12.3)     | 0.9430 |
| Butyric acid (mmol/g faeces)          | 9.1 (6.9-11.3)   | 9.5 (7.4-11.7)      | 0.9060 |
| Distribution                          |                  |                     |        |
| % Acetic acid                         | 60.8 (58.6-63.0) | 59.2 (57.2-61.2)    | 0.6485 |
| % Propionic acid                      | 19.8 (18.4-21.3) | 20.6 (19.1-22.1)    | 0.8335 |
| % Butyric acid                        | 16.8 (15.1-18.6) | 17.4 (15.8-19.1)    | 0.8638 |

---

**Table S5. Baseline and two months of dietary fibre treatment characteristics between responders and non-responders.** Data is presented as mean (95% CI of the mean, min–max). ). Significant differences within each group was determined by paired t-test analysis; p-values are included at the right hand of each column. Differences between groups (responder vs non-responder) were determined by one-way anova analysis. Tuckey’s multiple comparison tests were performed to determine differences between groups. P-values below 0.05 were considered as significant differences between the compared variables.

| Responder                         |                            |                           |               | Non-responder              |                          |               | p-value             |               |                         |
|-----------------------------------|----------------------------|---------------------------|---------------|----------------------------|--------------------------|---------------|---------------------|---------------|-------------------------|
| Number of volunteers              |                            |                           |               | 24                         |                          |               | 39                  |               |                         |
| Sex (female/male)                 |                            |                           |               | 15/9                       |                          |               | 22/17               |               |                         |
| Age (years)                       |                            |                           |               | 52.3 (49.3-55.2)           |                          |               | 54.9 (52.8-57.0)    |               |                         |
|                                   |                            |                           |               |                            |                          |               | 0.6335              |               |                         |
|                                   |                            |                           |               |                            |                          |               | 0.1443              |               |                         |
| Basal conditions                  |                            |                           |               | 2 months of treatment      |                          |               | Treatment (p-value) |               | Between Group (p-value) |
| Parameter                         | Responder                  | Non-responder             | p-value       | Responder                  | Non-responder            | p-value       | Responder           | Non-responder |                         |
| <i>Anthropometric parameters</i>  |                            |                           |               |                            |                          |               |                     |               |                         |
| Body mass index (kg/m²)           | 27.1 (25.7-28.5)           | 27.1 (26.0-28.1)          | 0.9540        | 27.1 (25.7-28.5)           | 27.0 (25.9-28.0)         | 0.9038        | 0.8704              | 0.4654        | 0.7364                  |
| Waist circumference               | 94.9 (91.2-98.6)           | 93.1 (90.2-96.0)          | 0.4487        | 96.4 (92.7-100.0)          | 95.5 (93.1-98.0)         | 0.7093        | 0.0730              | <b>0.0002</b> | 0.3018                  |
| Waist/Hip ratio                   | 0.91 (0.88-0.94)           | 0.90 (0.88-0.93)          | 0.7438        | 0.93 (0.90-0.96)           | 0.92 (0.90-0.94)         | 0.7416        | <b>0.0172</b>       | <b>0.0019</b> | 0.9520                  |
| <i>Skinfolds thickness</i>        |                            |                           |               |                            |                          |               |                     |               |                         |
| Biceps (mm)                       | 11.6 (9.5-13.8)            | 11.2 (9.8-12.6)           | 0.7489        | 12.9 (10.5-15.3)           | 12.1 (10.4-13.7)         | 0.5507        | <b>0.0108</b>       | 0.0642        | 0.5168                  |
| Triceps (mm)                      | 22.2 (19.4-24.9)           | 19.5 (17.2-21.7)          | 0.1449        | 22.0 (19.4-24.7)           | 20.4 (18.0-22.9)         | 0.4073        | 0.8667              | 0.0750        | 0.2546                  |
| Subscapular (mm)                  | 23.0 (20.0-26.0)           | 21.3 (19.5-23.1)          | 0.3137        | 22.8 (19.8-25.8)           | 20.4 (18.7-22.0)         | 0.1282        | 0.7715              | 0.0553        | 0.3074                  |
| Suprailiac (mm)                   | 15.7 (13.4-18.0)           | 16.4 (14.6-18.1)          | 0.6483        | 16.9 (14.9-18.9)           | 17.6 (15.7-19.4)         | 0.6467        | 0.1100              | 0.1466        | 0.9895                  |
| Body fat percentage (%)           | 31.0 (29.0-33.1)           | 28.6 (26.6-30.6)          | 0.1110        | 31.8 (29.7-34.0)           | 30.3 (28.3-32.2)         | 0.3118        | 0.0509              | <b>0.0163</b> | 0.3205                  |
| <i>Blood pressure</i>             |                            |                           |               |                            |                          |               |                     |               |                         |
| Systolic (mmHg)                   | 127 (120-135)              | 130 (125-136)             | 0.5313        | 128 (121-136)              | 125 (120-129)            | 0.4053        | 0.7608              | <b>0.0029</b> | <b>0.0404</b>           |
| Diastolic (mmHg)                  | 86 (82-90)                 | 86 (83-89)                | 0.9711        | 84 (79-88)                 | 84 (80-87)               | 0.9714        | 0.0646              | 0.0656        | 0.9138                  |
| <i>Nutritional parameters</i>     |                            |                           |               |                            |                          |               |                     |               |                         |
| Energy intake (kcal/day)          | 1834 (1686-1982)           | 1698 (1562-1833)          | 0.2045        | 1831 (1661-2002)           | 1679 (1505-1854)         | 0.2256        | 0.9743              | 0.8429        | 0.9090                  |
| Protein intake (g/day)            | 80.5 (69.8-91.2)           | 79.0 (68.2-89.8)          | 0.8499        | 84.0 (73.6-94.5)           | 75.7 (67.5-84.0)         | 0.2254        | 0.5185              | 0.5710        | 0.4224                  |
| Carbohydrate intake (g/day)       | <b>151.6 (125.0-178.1)</b> | <b>100.5 (84.0-116.1)</b> | <b>0.0009</b> | <b>146.4 (117.3-175.6)</b> | <b>98.8 (78.3-119.2)</b> | <b>0.0091</b> | 0.6007              | 0.8081        | 0.7733                  |
| Fat intake (g/day)                | 77.3 (67.0-87.6)           | 75.1 (65.7-84.5)          | 0.7664        | 78.2 (67.7-88.6)           | 65.4 (57.1-73.8)         | 0.0686        | 0.9015              | 0.0845        | 0.2291                  |
| Saturated fat (g/day)             | 23.7 (18.9-28.5)           | 22.6 (19.5-25.8)          | 0.7113        | 25.2 (20.7-29.7)           | 20.7 (17.6-23.8)         | 0.0987        | 0.5926              | 0.3039        | 0.2893                  |
| Monounsaturated fat (g/day)       | 31.2 (27.0-35.3)           | 32.2 (28.2-36.2)          | 0.7383        | 33.4 (28.6-38.1)           | 28.6 (25.0-32.2)         | 0.1222        | 0.4276              | 0.1343        | 0.1204                  |
| Polyunsaturated fat (g/day)       | 11.2 (9.3-13.1)            | 10.8 (9.3-12.3)           | 0.7511        | 10.2 (8.8-11.6)            | 9.6 (8.2-11.1)           | 0.5777        | 0.3399              | 0.2518        | 0.8894                  |
| Fibre intake (g/day)              | <b>22.0 (18.8-25.3)</b>    | <b>17.9 (16.0-19.7)</b>   | <b>0.0225</b> | 20.4 (17.5-23.2)           | 17.7 (15.3-20.1)         | 0.1748        | 0.3128              | 0.8991        | 0.4893                  |
| <i>Energy intake distribution</i> |                            |                           |               |                            |                          |               |                     |               |                         |
| Protein (%)                       | 17.4 (15.8-19.0)           | 18.1 (16.5-19.6)          | 0.5443        | 18.3 (16.6-20.1)           | 19.4 (17.4-21.3)         | 0.4733        | 0.3128              | 0.1640        | 0.8142                  |
| Carbohydrates (%)                 | 42.4 (39.2-45.5)           | 41.2 (38.0-44.5)          | 0.6482        | 41.5 (37.8-45.3)           | 42.1 (38.7-45.5)         | 0.8252        | 0.7066              | 0.6593        | 0.5781                  |
| Fat (%)                           | 38.1 (35.0-41.3)           | 38.9 (36.1-41.7)          | 0.7284        | 38.2 (34.7-41.7)           | 35.8 (33.0-38.7)         | 0.3047        | 0.9640              | 0.1018        | 0.2601                  |
| <i>Blood lipid profile</i>        |                            |                           |               |                            |                          |               |                     |               |                         |



|                                       |                            |                            |               |                     |                     |        |                   |                   |                   |
|---------------------------------------|----------------------------|----------------------------|---------------|---------------------|---------------------|--------|-------------------|-------------------|-------------------|
| Total cholesterol (mg/dL)             | <b>222.2 (211.4-232.9)</b> | <b>199.9 (193.0-206.8)</b> | <b>0.0007</b> | 206.1 (194.8-217.5) | 217.0 (210.0-224.0) | 0.0975 | <b>&lt;0.0001</b> | <b>&lt;0.0001</b> | <b>&lt;0.0001</b> |
| VLDL-Cholesterol (mg/dL)              | 13.1 (9.8-16.5)            | 12.4 (9.4-15.3)            | 0.7522        | 10.8 (7.8-13.7)     | 13.9 (10.8-16.9)    | 0.1854 | 0.1037            | 0.4332            | 0.1483            |
| IDL-Cholesterol (mg/dL)               | <b>12.4 (10.8-14.0)</b>    | <b>9.8 (8.8-10.9)</b>      | <b>0.0077</b> | 11.1 (9.6-12.7)     | 12.1 (10.8-13.5)    | 0.3676 | <b>0.0385</b>     | <b>0.0003</b>     | <b>0.0001</b>     |
| LDL-Cholesterol (mg/dL)               | <b>135.9 (128.2-143.7)</b> | <b>121.4 (115.5-127.3)</b> | <b>0.0047</b> | 126.3 (118.3-134.4) | 134.0 (128.4-139.6) | 0.1207 | <b>&lt;0.0001</b> | <b>&lt;0.0001</b> | <b>&lt;0.0001</b> |
| HDL-Cholesterol (mg/dL)               | 60.7 (55.8-65.7)           | 56.3 (53.3-59.3)           | 0.1143        | 57.9 (53.3-62.4)    | 57.0 (53.9-60.1)    | 0.7486 | <b>0.0182</b>     | 0.5071            | <b>0.0313</b>     |
| Total triacylglycerides (mg/dL)       | 113.4 (95.4-131.4)         | 107.8 (91.7-123.8)         | 0.6600        | 99.9 (84.8-115.1)   | 118.0 (103.2-132.7) | 0.1188 | <b>0.0407</b>     | 0.3352            | 0.0978            |
| VLDL-triacylglycerides (mg/dL)        | 66.9 (51.5-82.4)           | 68.3 (53.3-83.1)           | 0.9037        | 59.0 (46.7-71.3)    | 73.0 (60.6-85.4)    | 0.1454 | 0.1506            | 0.6181            | 0.3159            |
| IDL-triacylglycerides (mg/dL)         | <b>12.8 (11.5-14.0)</b>    | <b>10.8 (10.0-11.7)</b>    | <b>0.0124</b> | 11.4 (10.1-12.6)    | 12.5 (11.4-13.7)    | 0.1965 | <b>0.0079</b>     | <b>0.0019</b>     | <b>0.0001</b>     |
| LDL-triacylglycerides (mg/dL)         | <b>18.1 (16.3-19.9)</b>    | <b>14.6 (13.4-15.8)</b>    | <b>0.0018</b> | 15.8 (14.1-17.5)    | 17.4 (16.0-18.8)    | 0.1636 | <b>0.0003</b>     | <b>0.0001</b>     | <b>&lt;0.0001</b> |
| HDL-triacylglycerides (mg/dL)         | 15.6 (13.5-17.8)           | 14.0 (12.8-15.2)           | 0.1636        | 13.8 (12.3-15.3)    | 15.1 (13.5-16.6)    | 0.2898 | <b>0.0070</b>     | 0.2536            | <b>0.0246</b>     |
| Particle size                         |                            |                            |               |                     |                     |        |                   |                   |                   |
| VLDL-z                                | 42.82 (42.61-43.03)        | 42.69 (42.53-42.85)        | 0.2038        | 42.72 (42.52-42.93) | 42.62 (42.47-42.77) | 0.4032 | 0.2385            | 0.4556            | 0.8633            |
| LDL-z                                 | 21.13 (21.06-21.19)        | 21.07 (21.01-21.13)        | 0.3317        | 21.08 (21.02-21.14) | 21.05 (21.00-21.10) | 0.5008 | 0.1349            | 0.6088            | 0.5262            |
| HDL-z                                 | 8.21 (8.19-8.22)           | 8.19 (8.17-8.20)           | 0.1220        | 8.21 (8.19-8.22)    | 8.19 (8.17-8.20)    | 0.1737 | 0.7822            | 0.8923            | 0.7797            |
| Particle number                       |                            |                            |               |                     |                     |        |                   |                   |                   |
| Large VLDL (nmol/L)                   | 1.51 (1.25-1.77)           | 1.49 (1.23-1.74)           | 0.9394        | 1.34 (1.07-1.83)    | 1.60 (1.37-1.83)    | 0.1582 | 0.2127            | 0.4669            | 0.1987            |
| Medium VLDL (nmol/L)                  | 6.93 (5.67-8.19)           | 6.94 (5.58-8.30)           | 0.9939        | 7.31 (6.06-8.55)    | 7.31 (6.06-8.55)    | 0.1526 | 0.1157            | 0.6659            | 0.2666            |
| Small VLDL (nmol/L)                   | 35.4 (25.7-45.1)           | 35.9 (27.2-44.6)           | 0.9425        | 39.0 (31.5-46.5)    | 39.0 (31.5-46.5)    | 0.1630 | 0.1537            | 0.5718            | 0.3049            |
| Large LDL (nmol/L)                    | <b>125.3 (116.6-134.0)</b> | <b>108.9 (102.2-115.6)</b> | <b>0.0044</b> | 112.8 (104.6-120.9) | 118.4 (111.3-125.4) | 0.3198 | <b>0.0021</b>     | <b>0.0102</b>     | <b>0.0001</b>     |
| Medium LDL (nmol/L)                   | <b>370.6 (347.6-393.6)</b> | <b>322.4 (303.4-341.4)</b> | <b>0.0026</b> | 340.4 (316.7-364.1) | 361.6 (343.6-379.5) | 0.1636 | <b>&lt;0.0001</b> | <b>&lt;0.0001</b> | <b>&lt;0.0001</b> |
| Small LDL (nmol/L)                    | <b>474.0 (441.3-506.8)</b> | <b>434.0 (411.1-457.0)</b> | <b>0.0481</b> | 449.9 (414.1-485.7) | 485.2 (462.2-507.9) | 0.0915 | <b>0.0117</b>     | <b>&lt;0.0001</b> | <b>&lt;0.0001</b> |
| Large HDL (μmol/L)                    | 0.22 (0.17-0.26)           | 0.18 (0.16-0.20)           | 0.1504        | 0.18 (0.16-0.20)    | 0.21 (0.18-0.23)    | 0.1108 | 0.1378            | <b>0.0202</b>     | <b>0.0088</b>     |
| Medium HDL (μmol/L)                   | 9.69 (8.69-10.69)          | 8.43 (7.63-9.24)           | 0.0606        | 9.12 (8.09-10.15)   | 8.62 (7.82-9.41)    | 0.4449 | 0.0647            | 0.4604            | 0.0557            |
| Small HDL (μmol/L)                    | 22.47 (20.90-24.04)        | 21.75 (20.70-22.80)        | 0.4393        | 21.10 (19.86-22.34) | 22.28 (21.23-23.32) | 0.1669 | <b>0.0074</b>     | 0.3737            | <b>0.0254</b>     |
| Other parameters                      |                            |                            |               |                     |                     |        |                   |                   |                   |
| NonHDL-p (nmol/L)                     | <b>981 (919-1044)</b>      | <b>879 (836-922)</b>       | <b>0.0083</b> | 911 (845-977)       | 982 (940-1024)      | 0.0658 | <b>&lt;0.0001</b> | <b>&lt;0.0001</b> | <b>&lt;0.0001</b> |
| Total-p / HDL-p                       | 32.2 (29.4-35.0)           | 30.5 (28.6-32.2)           | 0.3051        | 31.7 (28.7-34.6)    | 33.1 (31.2-35.1)    | 0.3995 | 0.3379            | <b>0.0025</b>     | <b>0.0061</b>     |
| LDL-p/HDL-P                           | 30.8 (28.1-33.5)           | 29.0 (27.2-30.8)           | 0.2610        | 30.4 (27.6-33.2)    | 31.6 (29.7-33.5)    | 0.4740 | 0.4397            | <b>0.0083</b>     | <b>0.0188</b>     |
| <i>Faeces Short-chain Fatty acids</i> |                            |                            |               |                     |                     |        |                   |                   |                   |
| Total (mmol/g faeces)                 | 54.6 (37.7-71.5)           | 50.4 (38.3-62.5)           | 0.7143        | 57.1 (41.9-72.3)    | 49.8 (37.3-62.2)    | 0.5077 | 0.7612            | 0.5079            | 0.5066            |
| Acetic acid (mmol/g faeces)           | 35.5 (23.4-47.7)           | 30.2 (22.2-38.3)           | 0.5019        | 34.2 (25.0-43.5)    | 30.2 (22.7-37.7)    | 0.5496 | 0.8032            | 0.5194            | 0.8019            |
| Propionic acid (mmol/g faeces)        | 10.0 (7.2-12.9)            | 9.9 (7.4-12.5)             | 0.9720        | 11.2 (8.0-14.4)     | 10.5 (7.8-13.2)     | 0.7597 | 0.4424            | 0.6858            | 0.4131            |
| Butyric acid (mmol/g faeces)          | 8.8 (6.0-11.5)             | 9.3 (6.7-12.0)             | 0.8015        | 10.4 (6.9-13.8)     | 9.9 (7.2-12.5)      | 0.8403 | 0.3024            | 0.7242            | 0.3426            |
| Distribution                          |                            |                            |               |                     |                     |        |                   |                   |                   |
| % Acetic acid                         | 62.9 (59.6-66.2)           | 59.3 (57.0-61.7)           | 0.1139        | 61.2 (58.0-64.3)    | 57.7 (55.8-59.7)    | 0.0887 | 0.2281            | 0.2762            | 0.7782            |
| % Propionic acid                      | 19.8 (17.4-22.1)           | 19.9 (18.4-21.4)           | 0.9468        | 20.2 (18.0-22.5)    | 20.9 (19.3-22.4)    | 0.6689 | 0.5844            | 0.1212            | 0.5457            |
| % Butyric acid                        | 15.5 (13.1-17.9)           | 17.7 (15.7-19.6)           | 0.2223        | 16.2 (13.4-19.0)    | 18.4 (17.0-19.8)    | 0.1761 | 0.5812            | 0.8719            | 0.7273            |

**Figure S1. Baseline feces microbiota enterotypes.** A. and B. cluster analysis of microbiota composition at the genus level. Three enterotypes were identified mainly high in *Bacteroides* (cluster 3), high in *Prevotella* (cluster 1) and an intermediate cluster (cluster 2) with mixed composition of *Bacteroides* and *Prevotella*. C. and D. *Bacteroides* and *Prevotella* abundance in each cluster. E. and F. Microbiota genus that correlated with *Bacteroides* and *Prevotella* respectively.

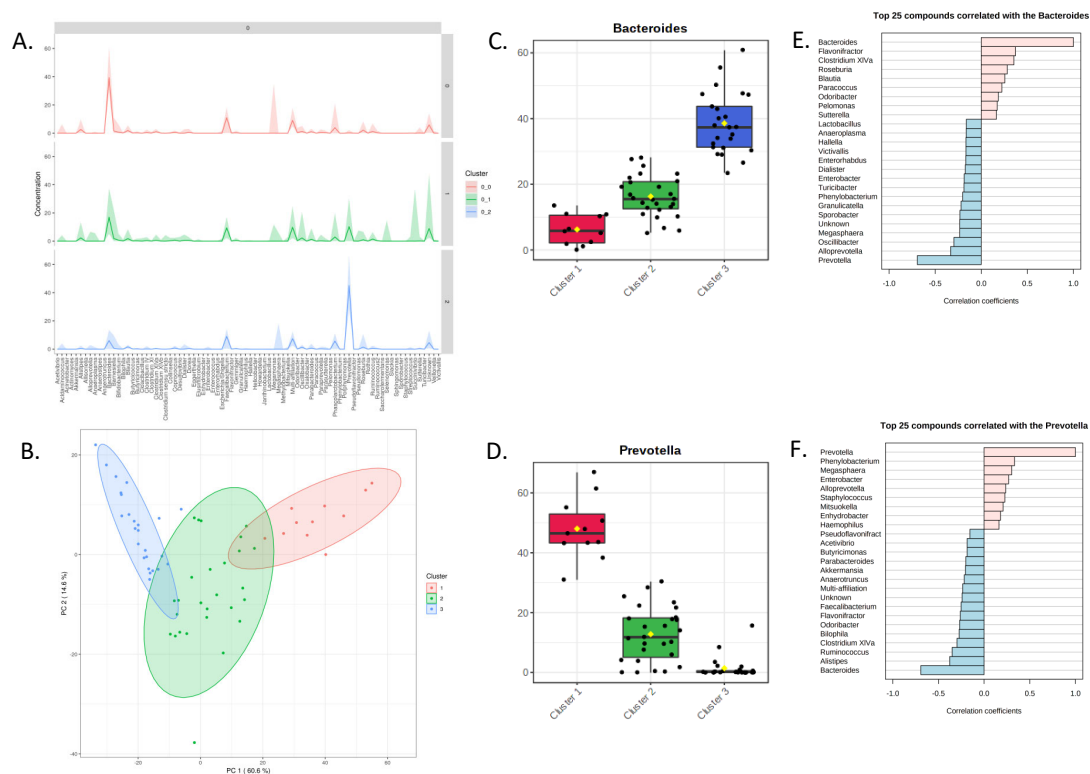

Supplement: s1 [file s1]
